# Supplementary material for: The dairy chains in North Africa (Algeria, Morocco and Tunisia): from self sufficiency options to food dependency?
Source: PubMed Central journal article supplement (PMC3647101; doi:10.1186/2193-1801-2-162), 2013-04-16

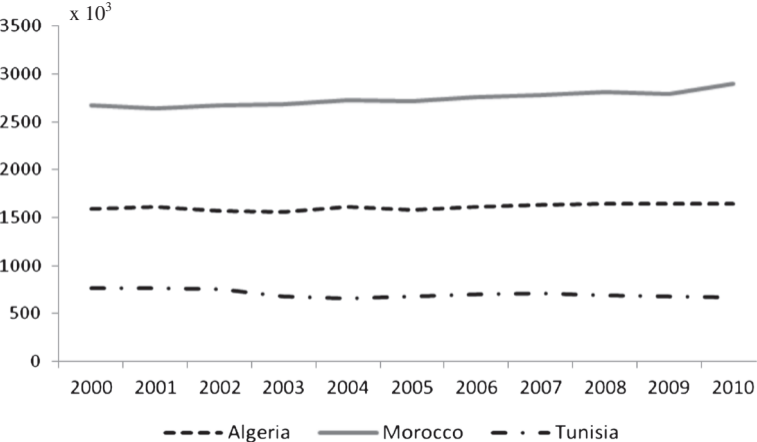

Supplement: 40064_2012_233_MOESM1_ESM.pdf [file 40064_2012_233_MOESM1_ESM.pdf]
